# Supplementary material
Source: Springer Nature journal article supplement (https://www.springermedizin.de/resource/supplementary/12969_2012_949_MOESM9_ESM.pdf/9588828)
Supplement: MOESM9 [file 9588828]

# Figure 5B

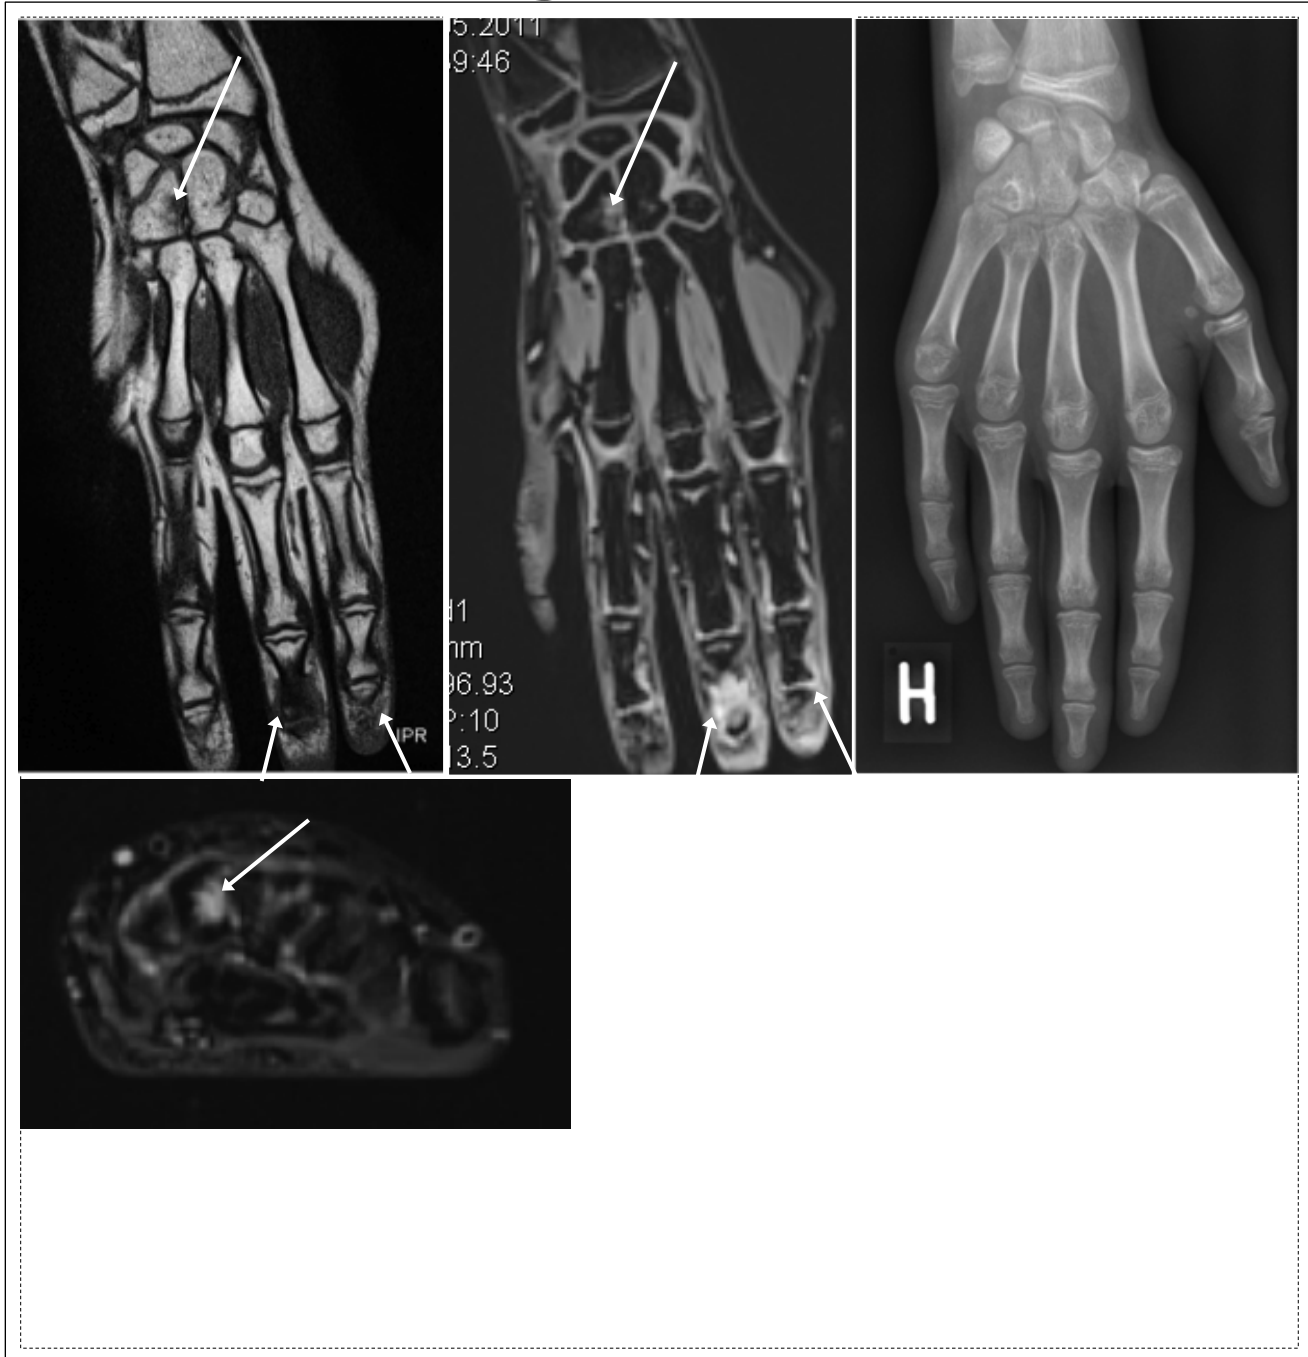

The rotation of the upper right x-ray is erroneous, as it appears on the screen when the ppt file is uploaded.

**Correct rotation of the x-ray** is shown on this pdf image.
